# Supplementary material for: Isothermal Analysis of ThermoFluor Data can readily provide Quantitative Binding Affinities
Source: PubMed Central journal article supplement (PMC6389909; doi:10.1038/s41598-018-37072-x), 2019-02-25
Supplement: 41598_2018_37072_MOESM1_ESM.pdf [file 41598_2018_37072_MOESM1_ESM.pdf]

Isothermal Analysis of ThermoFluor Data can readily provide  
Quantitative Binding Affinities  
(Supplemental Materials)

Nan Bai<sup>1,2</sup>, Heinrich Roder<sup>1</sup>, Alex Dickson<sup>3</sup>, and John Karanicolas<sup>1\*</sup>

<sup>1</sup>Program in Molecular Therapeutics, Fox Chase Cancer Center, Philadelphia, PA 19111

<sup>2</sup>Department of Molecular Biosciences, University of Kansas, Lawrence, KS 66045

<sup>3</sup>Department of Biochemistry & Molecular Biology and Department of Computational Mathematics,  
Science and Engineering, Michigan State University, East Lansing, MI 48824

\*To whom correspondence should be addressed. E-mail: [john.karanicolas@fccc.edu](mailto:john.karanicolas@fccc.edu), 215-728-7067

## Supplemental Figures

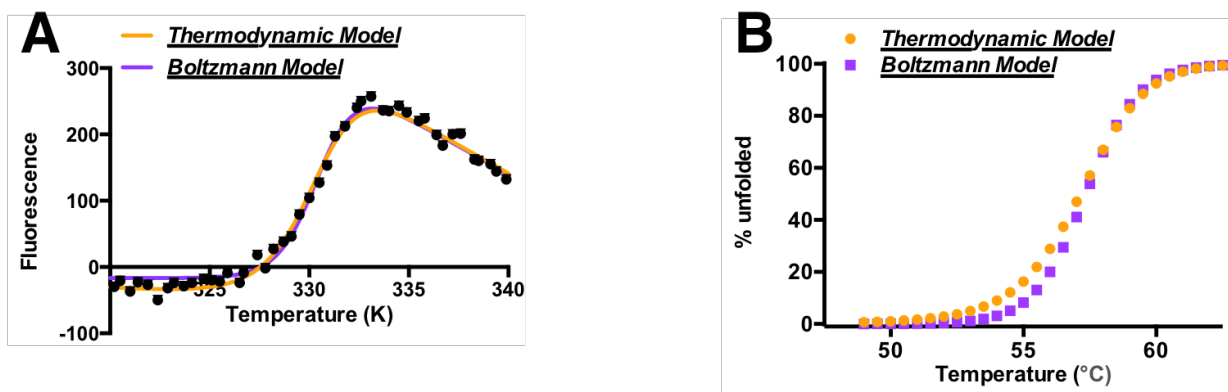

**Supplemental Figure S1: The fraction of protein unfolding, as calculated from raw fluorescence data using various models to fit melting curve. (A)** For analysis using both the thermodynamic model and the Boltzmann model, we included in the fitting linear (non-flat) baselines which necessary due to the temperature dependence of the dye. Both models fit the data well, but they differ slightly at the lower baseline. **(B)** These fits can be used to calculate the fraction of unfolded protein at different temperatures: results match closely between the two models, but they do exhibit a slight difference just below the transition region.

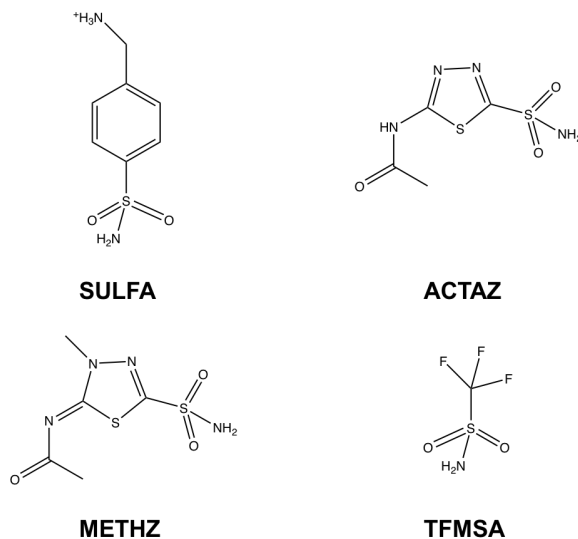

**Supplemental Figure S2: Chemical structures of the carbonic anhydrase inhibitors used in this study.**

# Appendix

## Detailed derivation of Equation 21

We start from the basic equilibrium between protein folding-unfolding and protein-ligand binding presented in the main text:

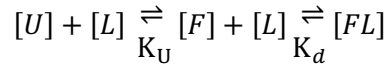

From here, we will consider the two specific conditions.

### 1) when no ligand is present:

$$[P]_T = [F]_0 + [U]_0 \quad (\text{A. 1})$$

$$[L]_T = [L]_0 = [FL]_0 = 0 \quad (\text{A. 2})$$

$$K_U = [U]_0/[F]_0 \quad (\text{A. 3})$$

$$f_{u0} = \frac{[U]_0}{[U]_0 + [F]_0} = \frac{1}{1 + 1/K_U} \quad (\text{A. 4})$$

Here,  $f_{u0}$  is the fraction unfolded protein in the absence of ligand.

Combining **Equation A.1** and **A.4** gives:

$$[U]_0 = f_{u0} \times [P]_T \quad (\text{A. 5})$$

$$K_U = \frac{f_{u0}}{1 - f_{u0}} \quad (\text{A. 6})$$

### 2) at the $EC_{50}$ :

The  $EC_{50}$  is defined as the ligand concentration at which the initial fraction unfolded ( $f_{u0}$ ) is reduced to half its original value. So:

$$[P]_T = [F]_{50} + [U]_{50} + [FL]_{50} \quad (\text{A. 7})$$

$$[L]_T = [L]_{50} + [FL]_{50} = EC_{50} \quad (\text{A. 8})$$

$$K_U = [U]_{50}/[F]_{50} \quad (\text{A. 9})$$

$$K_d = ([F]_{50} \times [L]_{50})/[FL]_{50} \quad (\text{A. 10})$$

$$[U]_{50} = \frac{[U]_0}{2} \quad (\text{A. 11})$$

where **Equation A.11** is derived from the definition of the  $EC_{50}$  (the fraction unfolded is half its original value). Combining **Equations A.9** and **A.11** gives:

$$[F]_{50} = \frac{[U]_{50}}{K_U} = \frac{[U]_0}{2 K_U} \quad (\text{A. 12})$$

Combining **Equations A.7, A.11** and **A.12** gives:

$$[FL]_{50} = [P]_T - [U]_{50} - [F]_{50} = [P]_T - \frac{[U]_0}{2} - \frac{[U]_0}{2K_U} = [P]_T - \frac{[U]_0}{2} \left(1 + \frac{1}{K_U}\right) \quad (\text{A. 13})$$

Combining **Equations A.5, A.6** and **A.13** gives:

$$[FL]_{50} = [P]_T - \frac{[U]_0}{2} \times \left(1 + \frac{1 - f_{u0}}{f_{u0}}\right) = [P]_T - \frac{[U]_0}{2} \times \frac{1}{f_{u0}} = [P]_T - \frac{[P]_T}{2} = \frac{[P]_T}{2} \quad (\text{A. 14})$$

Combining **Equations A.5, A.6, A.10, A.12** and **A.14** gives:

$$\begin{aligned} [L]_{50} &= [FL]_{50} \times \frac{K_d}{[F]_{50}} = \frac{[P]_T}{2} \times K_d \times \frac{1}{\frac{[U]_0}{2K_U}} = \frac{[P]_T}{2} \times K_d \times \frac{2K_U}{[U]_0} \\ &= \frac{[P]_T}{2} \times K_d \times \frac{f_{u0}}{1 - f_{u0}} = \frac{[P]_T}{2} \times K_d \times \frac{1}{\frac{1}{2} [P]_T (1 - f_{u0})} \\ &= \frac{K_d}{1 - f_{u0}} \end{aligned} \quad (\text{A. 15})$$

Combining **Equations A.8, A.14** and **A.15** gives:

$$EC_{50} = [L]_{50} + [FL]_{50} = \frac{K_d}{1 - f_{u0}} + \frac{[P]_T}{2} \quad (\text{A. 16})$$

$$K_d = (1 - f_{u0}) \times \left( EC_{50} - \frac{[P]_T}{2} \right) \quad (\text{A. 17})$$

The latter two equations (**A.16** and **A.17**) correspond to **Equations 20** and **21** in the main text.
